# Supplementary material for: Survival of 7,311 lung cancer patients by pathological stage and histological classification: a multicenter hospital-based study in China
Source: PubMed Central journal article supplement — Transl Lung Cancer Res. 2022 Aug;11(8):1591–605. doi: 10.21037/tlcr-22-240 (PMC9459622; doi:10.21037/tlcr-22-240), 2022-08
Supplement: tlcr-11-08-1591-dss.pdf [file tlcr-11-08-1591-dss.pdf]

## Data Sharing Statement

|                     |                                                                                                                                                    |                                                                                                                       |
|---------------------|----------------------------------------------------------------------------------------------------------------------------------------------------|-----------------------------------------------------------------------------------------------------------------------|
| <b>Article Info</b> | <a href="https://dx.doi.org/10.21037/tlcr-22-240">https://dx.doi.org/10.21037/tlcr-22-240</a>                                                      |                                                                                                                       |
| <b>Item</b>         | <b>Question</b>                                                                                                                                    | <b>Authors' Response<br/>(place "-" if not applicable)</b>                                                            |
| 1                   | Would you like to share data collected for your study to others?                                                                                   | The data that support the findings of this study are available from the corresponding author upon reasonable request. |
| 2                   | If not, would you like to share the reason for your decision?                                                                                      | -                                                                                                                     |
| 3                   | What data in particular will be shared?                                                                                                            | The main findings and characteristics of participants of this work.                                                   |
| 4                   | Any other documents will be share? Such as study protocol, statistical analysis plan, informed consent form, clinical study report, analytic code. | Statistical analysis plan, informed consent form, and clinical study report will also be shared if requested.         |
| 5                   | When will data availability begin?                                                                                                                 | From the publication date.                                                                                            |
| 6                   | When will data availability end?                                                                                                                   | Two years within the publication date, since the survival data may be updated over time.                              |
| 7                   | To whom will you share the data?                                                                                                                   | Researchers with reasonable application and interested in our study.                                                  |
| 8                   | For what type of analysis or purpose?                                                                                                              | Non-commercial use.                                                                                                   |
| 9                   | How or where can the data/ documents be obtained?                                                                                                  | Contact the corresponding author with details and reasonable statement.                                               |
| 10                  | Any other restrictions?                                                                                                                            | We may balance the potential benefits and risks for each request and then provide the data that could be shared.      |
