# Supplementary material for: Survival of 7,311 lung cancer patients by pathological stage and histological classification: a multicenter hospital-based study in China
Source: PubMed Central journal article supplement — Transl Lung Cancer Res. 2022 Aug;11(8):1591–605. doi: 10.21037/tlcr-22-240 (PMC9459622; doi:10.21037/tlcr-22-240), 2022-08
Supplement: tlcr-11-08-1591-supplementary.pdf [file tlcr-11-08-1591-supplementary.pdf]

**Table S1** Baseline characteristics of 7,311 lung cancer patients by histological classification

| Characteristic               | Total <sup>a</sup> | Histological Classification |                         |                |                     |                      | P value <sup>d</sup> |
|------------------------------|--------------------|-----------------------------|-------------------------|----------------|---------------------|----------------------|----------------------|
|                              |                    | Small cell carcinoma        | Squamous cell carcinoma | Adenocarcinoma | Others <sup>b</sup> | Unknown <sup>c</sup> |                      |
| Age                          |                    |                             |                         |                |                     |                      | <0.01                |
| <60                          | 3,401 (46.5)       | 470 (50.1)                  | 609 (38.6)              | 1,695 (50.8)   | 267 (51.5)          | 360 (38.3)           |                      |
| ≥60                          | 3,910 (53.5)       | 468 (49.9)                  | 970 (61.4)              | 1,640 (49.2)   | 251 (48.5)          | 581 (61.7)           |                      |
| Sex                          |                    |                             |                         |                |                     |                      | <0.01                |
| Male                         | 4,912 (67.2)       | 725 (77.3)                  | 1,431 (90.6)            | 1,759 (52.7)   | 362 (69.9)          | 635 (67.5)           |                      |
| Female                       | 2,399 (32.8)       | 213 (22.7)                  | 148 (9.4)               | 1,576 (47.3)   | 156 (30.1)          | 306 (32.5)           |                      |
| Smoking                      |                    |                             |                         |                |                     |                      | <0.01                |
| Never-smoker                 | 3,283 (44.9)       | 321 (34.2)                  | 298 (18.9)              | 1,997 (59.9)   | 216 (41.7)          | 451 (47.9)           |                      |
| Current-smoker               | 3,148 (43.1)       | 502 (53.5)                  | 1,002 (63.5)            | 1,025 (30.7)   | 239 (46.1)          | 380 (40.4)           |                      |
| Former-smoker                | 812 (11.1)         | 106 (11.3)                  | 268 (17)                | 280 (8.4)      | 59 (11.4)           | 99 (10.5)            |                      |
| Unknown <sup>c</sup>         | 68 (0.9)           | 9 (1.0)                     | 11 (0.7)                | 33 (1.0)       | 4 (0.8)             | 11 (1.2)             |                      |
| Alcohol assumption           |                    |                             |                         |                |                     |                      | <0.01                |
| No                           | 4,968 (68.0)       | 573 (61.1)                  | 840 (53.2)              | 2,541 (76.2)   | 343 (66.2)          | 671 (71.3)           |                      |
| Yes                          | 2,281 (31.2)       | 359 (38.3)                  | 726 (46.0)              | 767 (23.0)     | 172 (33.2)          | 257 (27.3)           |                      |
| Unknown <sup>c</sup>         | 62 (0.8)           | 6 (0.6)                     | 13 (0.8)                | 27 (0.8)       | 3 (0.6)             | 13 (1.4)             |                      |
| Disease history              |                    |                             |                         |                |                     |                      | <0.01                |
| No                           | 5,547 (75.9)       | 725 (77.3)                  | 1,201 (76.1)            | 2,449 (73.4)   | 419 (80.9)          | 753 (80.0)           |                      |
| Yes <sup>e</sup>             | 1,654 (22.6)       | 202 (21.5)                  | 338 (21.4)              | 856 (25.7)     | 98 (18.9)           | 160 (17.0)           |                      |
| Unknown <sup>c</sup>         | 110 (1.5)          | 11 (1.2)                    | 40 (2.5)                | 30 (0.9)       | 1 (0.2)             | 28 (3.0)             |                      |
| Family history               |                    |                             |                         |                |                     |                      | =0.55                |
| No                           | 6,553 (89.6)       | 829 (88.4)                  | 1,382 (87.5)            | 3,005 (90.1)   | 485 (93.6)          | 852 (90.5)           |                      |
| Yes <sup>f</sup>             | 283 (3.9)          | 36 (3.8)                    | 62 (3.9)                | 152 (4.6)      | 18 (3.5)            | 15 (1.6)             |                      |
| Unknown <sup>c</sup>         | 475 (6.5)          | 73 (7.8)                    | 135 (8.5)               | 178 (5.3)      | 15 (2.9)            | 74 (7.9)             |                      |
| Body Mass Index <sup>g</sup> |                    |                             |                         |                |                     |                      | <0.01                |
| Underweight                  | 342 (4.7)          | 39 (4.2)                    | 94 (6.0)                | 121 (3.6)      | 24 (4.6)            | 64 (6.8)             |                      |
| Normal                       | 3,372 (46.1)       | 459 (48.9)                  | 719 (45.5)              | 1,561 (46.8)   | 233 (45.0)          | 400 (42.5)           |                      |
| Overweight                   | 1,508 (20.6)       | 207 (22.1)                  | 275 (17.4)              | 767 (23.0)     | 128 (24.7)          | 131 (13.9)           |                      |
| Unknown <sup>c</sup>         | 2,089 (28.6)       | 233 (24.8)                  | 491 (31.1)              | 886 (26.6)     | 133 (25.7)          | 346 (36.8)           |                      |
| Pathological stage           |                    |                             |                         |                |                     |                      | <0.01                |
| Stage I                      | 1,067 (14.6)       | 51 (5.4)                    | 201 (12.7)              | 704 (21.1)     | 71 (13.7)           | 40 (4.3)             |                      |
| Stage II                     | 374 (5.1)          | 20 (2.1)                    | 130 (8.2)               | 183 (5.5)      | 32 (6.2)            | 9 (1.0)              |                      |
| Stage III                    | 1,431 (19.6)       | 212 (22.6)                  | 430 (27.2)              | 558 (16.7)     | 115 (22.2)          | 116 (12.3)           |                      |
| Stage IV                     | 2,674 (36.6)       | 310 (33.0)                  | 388 (24.6)              | 1,344 (40.3)   | 178 (34.4)          | 454 (48.2)           |                      |
| Unknown <sup>c</sup>         | 1,765 (24.1)       | 345 (36.8)                  | 430 (27.2)              | 546 (16.4)     | 122 (23.6)          | 322 (34.2)           |                      |

**Table S1** (continued)

**Table S1** (continued)

| Characteristic         | Total <sup>a</sup> | Histological Classification |                         |                |                     |                      | P value <sup>d</sup> |
|------------------------|--------------------|-----------------------------|-------------------------|----------------|---------------------|----------------------|----------------------|
|                        |                    | Small cell carcinoma        | Squamous cell carcinoma | Adenocarcinoma | Others <sup>b</sup> | Unknown <sup>c</sup> |                      |
| Lesion site            |                    |                             |                         |                |                     |                      | <0.01                |
| Right                  | 3,971 (54.3)       | 459 (48.9)                  | 803 (50.9)              | 1,930 (57.9)   | 287 (55.4)          | 492 (52.3)           |                      |
| Left                   | 3,184 (43.6)       | 459 (48.9)                  | 755 (47.8)              | 1,362 (40.8)   | 225 (43.4)          | 383 (40.7)           |                      |
| Both                   | 49 (0.7)           | 4 (0.4)                     | 11 (0.7)                | 23 (0.7)       | 1 (0.2)             | 10 (1.1)             |                      |
| Unknown <sup>c</sup>   | 107 (1.5)          | 16 (1.7)                    | 10 (0.6)                | 20 (0.6)       | 5 (1.0)             | 56 (6.0)             |                      |
| Treatment <sup>e</sup> |                    |                             |                         |                |                     |                      | <0.01                |
| No                     | 6,307 (86.3)       | 849 (90.5)                  | 1,366 (86.5)            | 3,061 (91.8)   | 451 (87.1)          | 580 (61.6)           |                      |
| Yes <sup>h</sup>       | 954 (13)           | 86 (9.2)                    | 196 (12.4)              | 257 (7.7)      | 67 (12.9)           | 348 (37.0)           |                      |
| Unknown <sup>c</sup>   | 50 (0.7)           | 3 (0.3)                     | 17 (1.1)                | 17 (0.5)       | 0 (0.0)             | 13 (1.4)             |                      |
| Sample size            | 7,311              | 938                         | 1579                    | 3335           | 518                 | 941                  |                      |

Categorical data are shown as n (%). <sup>a</sup>, The total proportion may not be 100 due to the rounding. <sup>b</sup>, Including large cell carcinoma, carcinoid, sarcomatoid carcinoma, and adenosquamous carcinoma. <sup>c</sup>, Unknown data were not included in the statistical tests. <sup>d</sup>, P values were calculated by Chi square/Fisher exact test. <sup>e</sup>, Referring to lung diseases, such as tuberculosis, chronic bronchitis, emphysema, asthma, and silicosis/pneumoconiosis. <sup>f</sup>, Referring to participants with first-degree or second-degree relatives diagnosed with any type of lung cancer. <sup>g</sup>, BMI was calculated based on the height and weight values, and was categorized in to 3 groups according to the WHO standard, which were underweight (<18.5 kg/m<sup>2</sup>), normal (18.5–24.9 kg/m<sup>2</sup>), and overweight (≥25 kg/m<sup>2</sup>). <sup>h</sup>, Including surgery, chemotherapy, radiotherapy and targeted therapy. ,

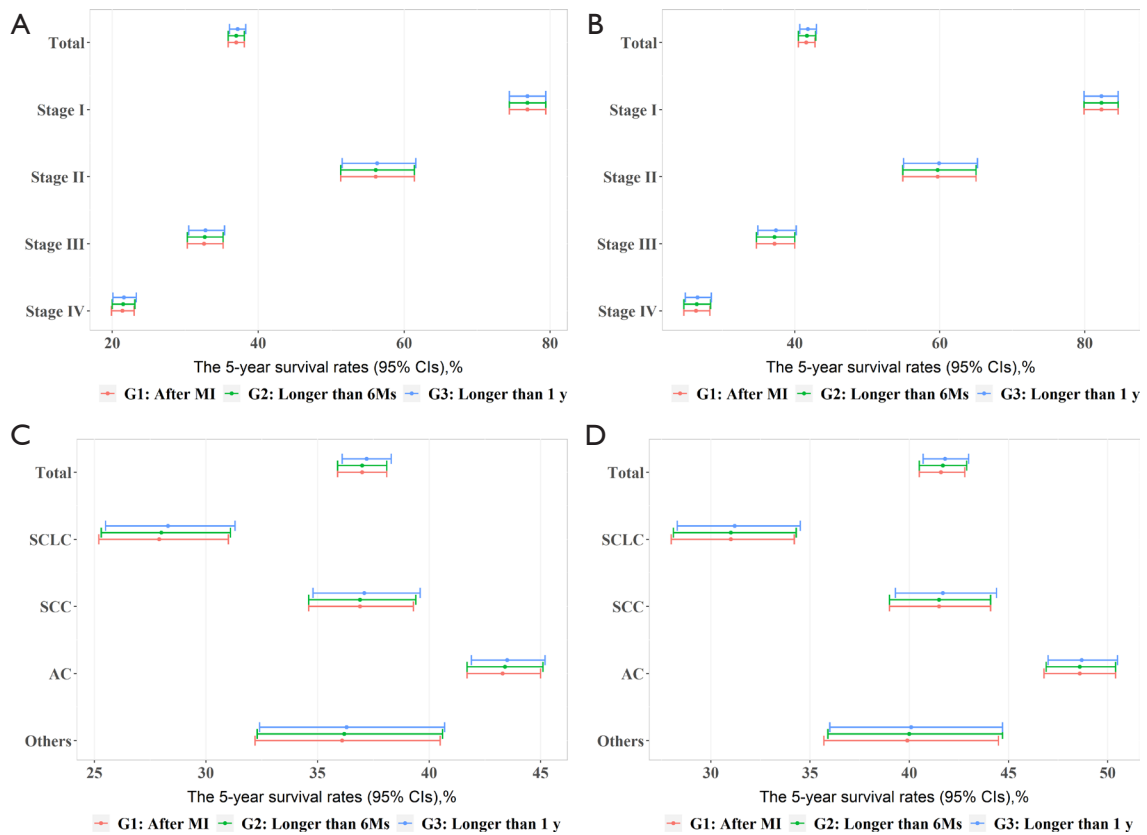

**Figure S1** The 5-year survival rates (95% CIs) of lung cancer patients, by pathological stage (A,B) and by histological classification (C,D). Group 1: Red represents the findings of primary analysis in the manuscript. Group 2: Green represents the results based on the patients without follow-up within 6 months (Sensitivity analysis 1). Group 3: Blue represents the results after excluding the patients without follow-up within 12 months (Sensitivity analysis 2).
